# Supplementary material for: Clinical Decision Support Systems for Antibiotic Prescribing: An Inventory of Current French Language Tools
Source: MDPI journal article supplement (doi:10.3390/antibiotics11030384), 2022-03-14
Supplement: s1 [file s1]

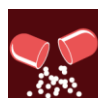

## Supplementary Materials

Table S1. Search strategy for Pubmed.

| Keywords and MeshWords for PubMed |                                                                                                                                                                                                                                                                                                                          |
|-----------------------------------|--------------------------------------------------------------------------------------------------------------------------------------------------------------------------------------------------------------------------------------------------------------------------------------------------------------------------|
| CDSS                              | ("Decision Support Systems, Clinical"[Mesh] OR "CDSS"[tiab] OR "computerized decision support system"[tiab] OR "clinical decision support system"[tiab] OR "clinical decision support"[tiab] OR "computer-aided decision support"[tiab] OR "computer-assisted decision support"[tiab] OR "smartphone application"[tiab]) |
| Antibiotics                       | "Anti-Bacterial Agents"[Mesh] OR "Anti-Infective Agents"[Mesh] OR Antibiotic*[tiab] OR Anti-biotic*[tiab] OR Antimicrobial*[tiab] OR Anti-microbial*[tiab] OR Antibacterial*[tiab] OR Anti-bacterial*[tiab] OR Antiinfective*[tiab] OR Anti-infective*[tiab]                                                             |
| French-language                   | "France" OR "French"                                                                                                                                                                                                                                                                                                     |

Table S2. Characteristics of *Antibioclic*.

| Antibioclic                     |                    |                                                                                                                                                                                                |
|---------------------------------|--------------------|------------------------------------------------------------------------------------------------------------------------------------------------------------------------------------------------|
| Administration                  |                    |                                                                                                                                                                                                |
| Name                            | Comité Antibioclic |                                                                                                                                                                                                |
| Funding                         | Nature             | Public                                                                                                                                                                                         |
|                                 | Name(s)            | - French Infectious Diseases Society (SPILF)<br>- French College of General Medicine (CMG)<br>- French College of Teaching General Practitioners (CNGE)                                        |
| Scientific references           |                    | Guidelines from scientific societies, French Infectious Diseases Society (SPILF), College of Professors of Infectious and Tropical Diseases (CMIT), French National Authority for Health (HAS) |
| Date of creation                |                    | 2011                                                                                                                                                                                           |
| Updating                        | Last               | April 2021                                                                                                                                                                                     |
|                                 | Frequency          | Monthly                                                                                                                                                                                        |
| Contact                         |                    | contact.antibioclic@gmail.com                                                                                                                                                                  |
| Access                          |                    |                                                                                                                                                                                                |
| Cost                            |                    | Free                                                                                                                                                                                           |
| Smartphone app                  |                    | Yes                                                                                                                                                                                            |
| iOS                             |                    | Yes                                                                                                                                                                                            |
| Downloads (n)                   |                    | N/A                                                                                                                                                                                            |
| Reviews (n)                     |                    | 25                                                                                                                                                                                             |
| Rating (/5)                     |                    | 5                                                                                                                                                                                              |
| Android                         |                    | Yes                                                                                                                                                                                            |
| Downloads (n)                   |                    | N/A                                                                                                                                                                                            |
| Reviews (n)                     |                    | 138                                                                                                                                                                                            |
| Rating (/5)                     |                    | 4,5                                                                                                                                                                                            |
| Website                         |                    | Yes                                                                                                                                                                                            |
| Website URL                     |                    | <a href="https://antibioclic.com/">https://antibioclic.com/</a>                                                                                                                                |
| Users/day (n)                   |                    | 5365 (2018)                                                                                                                                                                                    |
| Requests/day (n)                |                    | 11 125 (2018)                                                                                                                                                                                  |
| Offline mode                    |                    | Yes                                                                                                                                                                                            |
| Software                        |                    | No                                                                                                                                                                                             |
| Local parameterization possible |                    | No                                                                                                                                                                                             |

|  |                                        |                                                                                                                                                                                                                                                                                                                                                                                                        |
|--|----------------------------------------|--------------------------------------------------------------------------------------------------------------------------------------------------------------------------------------------------------------------------------------------------------------------------------------------------------------------------------------------------------------------------------------------------------|
|  | Developer                              | No                                                                                                                                                                                                                                                                                                                                                                                                     |
|  | User                                   | No                                                                                                                                                                                                                                                                                                                                                                                                     |
|  | Users                                  |                                                                                                                                                                                                                                                                                                                                                                                                        |
|  | Primary care                           | Yes                                                                                                                                                                                                                                                                                                                                                                                                    |
|  | Dental medicine                        | No                                                                                                                                                                                                                                                                                                                                                                                                     |
|  | Hospital medicine                      | No                                                                                                                                                                                                                                                                                                                                                                                                     |
|  | Surgical prophylaxis                   | No                                                                                                                                                                                                                                                                                                                                                                                                     |
|  | Patients                               |                                                                                                                                                                                                                                                                                                                                                                                                        |
|  | Children                               | Yes                                                                                                                                                                                                                                                                                                                                                                                                    |
|  | Pregnant women                         | Yes                                                                                                                                                                                                                                                                                                                                                                                                    |
|  | Breastfeeding                          | Yes                                                                                                                                                                                                                                                                                                                                                                                                    |
|  | Chronic kidney disease                 | Yes                                                                                                                                                                                                                                                                                                                                                                                                    |
|  | Informations required                  |                                                                                                                                                                                                                                                                                                                                                                                                        |
|  | Urinary tract infections               |                                                                                                                                                                                                                                                                                                                                                                                                        |
|  | Genital infections                     |                                                                                                                                                                                                                                                                                                                                                                                                        |
|  | Upper respiratory tract infections     |                                                                                                                                                                                                                                                                                                                                                                                                        |
|  | Lower respiratory tract infections     |                                                                                                                                                                                                                                                                                                                                                                                                        |
|  | Skin and soft tissues infections       |                                                                                                                                                                                                                                                                                                                                                                                                        |
|  | Digestive tract infections             |                                                                                                                                                                                                                                                                                                                                                                                                        |
|  | Prophylaxis                            |                                                                                                                                                                                                                                                                                                                                                                                                        |
|  | COVID-19                               |                                                                                                                                                                                                                                                                                                                                                                                                        |
|  | Site of infection                      |                                                                                                                                                                                                                                                                                                                                                                                                        |
|  | Nature of infection                    |                                                                                                                                                                                                                                                                                                                                                                                                        |
|  | Patient profile (Adults/Children)      |                                                                                                                                                                                                                                                                                                                                                                                                        |
|  | Pregnant women                         |                                                                                                                                                                                                                                                                                                                                                                                                        |
|  | Breastfeeding                          |                                                                                                                                                                                                                                                                                                                                                                                                        |
|  | Chronic Kidney Disease                 |                                                                                                                                                                                                                                                                                                                                                                                                        |
|  | Additional information about infection |                                                                                                                                                                                                                                                                                                                                                                                                        |
|  | Type of information provided           |                                                                                                                                                                                                                                                                                                                                                                                                        |
|  | Antibiotic selection                   | Yes                                                                                                                                                                                                                                                                                                                                                                                                    |
|  | Priority                               | Yes                                                                                                                                                                                                                                                                                                                                                                                                    |
|  | Dose                                   | Yes                                                                                                                                                                                                                                                                                                                                                                                                    |
|  | Route of administration                | Yes                                                                                                                                                                                                                                                                                                                                                                                                    |
|  | Duration                               | Yes                                                                                                                                                                                                                                                                                                                                                                                                    |
|  | Allergy                                | Yes                                                                                                                                                                                                                                                                                                                                                                                                    |
|  | Side effects                           | No                                                                                                                                                                                                                                                                                                                                                                                                     |
|  | Adaptation GFR                         | Yes                                                                                                                                                                                                                                                                                                                                                                                                    |
|  | Prescription printing                  | Only on Antibioclic+ (additional service for users in the Parisian area)                                                                                                                                                                                                                                                                                                                               |
|  | Context and reminders                  | Yes                                                                                                                                                                                                                                                                                                                                                                                                    |
|  | Locally adapted                        | No                                                                                                                                                                                                                                                                                                                                                                                                     |
|  | Scientific sources cited               | Yes                                                                                                                                                                                                                                                                                                                                                                                                    |
|  | References                             | <p>- Jeanmougin et al. [Antibioclic: a tool for rational antibiotic therapy in primary care]. <i>Rev Prat</i> 2012</p> <p>- Delory et al. [A computerized decision support system (CDSS) for antibiotic prescription in primary care—Antibioclic: implementation, adoption and sustainable use in the era of extended antimicrobial resistance]. <i>Journal of Antimicrobial Chemotherapy</i> 2020</p> |
|  | Description                            | <p>CDSS description</p> <p>Implementation process and utilization</p>                                                                                                                                                                                                                                                                                                                                  |

**Table S3.** Characteristics of *Antibiogarde*.

| Antibiogarde                    |                                           |                                                                                                                                                                                                                                                                                                                                                   |
|---------------------------------|-------------------------------------------|---------------------------------------------------------------------------------------------------------------------------------------------------------------------------------------------------------------------------------------------------------------------------------------------------------------------------------------------------|
| Administration                  |                                           |                                                                                                                                                                                                                                                                                                                                                   |
| Name                            |                                           | Association des Auteurs d'ANTIBIOGARDE                                                                                                                                                                                                                                                                                                            |
| Funding                         | Nature                                    | Public                                                                                                                                                                                                                                                                                                                                            |
|                                 | Name(s)                                   | French National Authority for Health (HAS)                                                                                                                                                                                                                                                                                                        |
| Scientific references           |                                           | National guidelines mainly from French Infectious Diseases Society (SPILF), College of Professors of Infectious and Tropical Diseases (CMIT), French Society of Anesthesia and Intensive Care Medicine (SFAR), French Intensive Care Society (SRLF), French Society of Respiratory Diseases (SPLF) and French National Authority for Health (HAS) |
| Date of creation                |                                           | 2003                                                                                                                                                                                                                                                                                                                                              |
| Updating                        | Last                                      | 2020                                                                                                                                                                                                                                                                                                                                              |
|                                 | Frequency                                 | Yearly                                                                                                                                                                                                                                                                                                                                            |
| Contact                         |                                           | contact@antibiogarde.org                                                                                                                                                                                                                                                                                                                          |
| Access                          |                                           |                                                                                                                                                                                                                                                                                                                                                   |
| Cost                            |                                           | 7,99 € per year for website<br>9,99 € per year for iOS app                                                                                                                                                                                                                                                                                        |
| Smartphone app                  |                                           | Yes                                                                                                                                                                                                                                                                                                                                               |
| iOS                             |                                           | Yes                                                                                                                                                                                                                                                                                                                                               |
| Downloads (n)                   |                                           | N/A                                                                                                                                                                                                                                                                                                                                               |
| Reviews (n)                     |                                           | 2                                                                                                                                                                                                                                                                                                                                                 |
| Rating (/5)                     |                                           | 5                                                                                                                                                                                                                                                                                                                                                 |
| Android                         |                                           | No                                                                                                                                                                                                                                                                                                                                                |
| Downloads (n)                   |                                           | N/A                                                                                                                                                                                                                                                                                                                                               |
| Reviews (n)                     |                                           | N/A                                                                                                                                                                                                                                                                                                                                               |
| Rating (/5)                     |                                           | N/A                                                                                                                                                                                                                                                                                                                                               |
| Website                         |                                           | Yes                                                                                                                                                                                                                                                                                                                                               |
| Website URL                     | https://webhopital.antibiogarde.org/login |                                                                                                                                                                                                                                                                                                                                                   |
| Users/day (n)                   |                                           | N/A                                                                                                                                                                                                                                                                                                                                               |
| Requests/day (n)                |                                           | N/A                                                                                                                                                                                                                                                                                                                                               |
| Offline mode                    |                                           | Yes                                                                                                                                                                                                                                                                                                                                               |
| Software                        |                                           | Yes (via hospital Intranet)                                                                                                                                                                                                                                                                                                                       |
| Local parameterization possible |                                           | Yes                                                                                                                                                                                                                                                                                                                                               |
| Developer                       |                                           | Yes                                                                                                                                                                                                                                                                                                                                               |
| User                            |                                           | N/A                                                                                                                                                                                                                                                                                                                                               |
| Users                           |                                           |                                                                                                                                                                                                                                                                                                                                                   |
| Primary care                    |                                           | Yes                                                                                                                                                                                                                                                                                                                                               |
| Dental medicine                 |                                           | Yes                                                                                                                                                                                                                                                                                                                                               |
| Hospital medicine               |                                           | Yes                                                                                                                                                                                                                                                                                                                                               |
| Surgical prophylaxis            |                                           | No                                                                                                                                                                                                                                                                                                                                                |
| Patients                        |                                           |                                                                                                                                                                                                                                                                                                                                                   |
| Children                        |                                           | Yes (incomplete)                                                                                                                                                                                                                                                                                                                                  |
| Pregnant women                  |                                           | Yes (incomplete)                                                                                                                                                                                                                                                                                                                                  |

|                              |                                                                                                                                                                                                                                                                                                                              |
|------------------------------|------------------------------------------------------------------------------------------------------------------------------------------------------------------------------------------------------------------------------------------------------------------------------------------------------------------------------|
| Breastfeeding                | No                                                                                                                                                                                                                                                                                                                           |
| Chronic kidney disease       | Yes                                                                                                                                                                                                                                                                                                                          |
| Informations                 |                                                                                                                                                                                                                                                                                                                              |
| Type of infection            | Urinary tract infections<br>Genital infections<br>Upper respiratory tract infections<br>Lower respiratory tract infections<br>Skin and soft tissues infections<br>Digestive tract infections<br>Central nervous system infections<br>Bone and joint infections<br>Eye infections<br>Dental infections<br>Febrile neutropenia |
| Systematic criteria          | Site of infection<br>Nature of infection                                                                                                                                                                                                                                                                                     |
| Optional criteria            | Additional information about infection or patient                                                                                                                                                                                                                                                                            |
| Type of information provided |                                                                                                                                                                                                                                                                                                                              |
| Antibiotic selection         | Yes                                                                                                                                                                                                                                                                                                                          |
| Priority                     | Yes                                                                                                                                                                                                                                                                                                                          |
| Dose                         | Yes                                                                                                                                                                                                                                                                                                                          |
| Route of administration      | Yes                                                                                                                                                                                                                                                                                                                          |
| Duration                     | Yes                                                                                                                                                                                                                                                                                                                          |
| Allergy                      | Yes                                                                                                                                                                                                                                                                                                                          |
| Side effects                 | No                                                                                                                                                                                                                                                                                                                           |
| Adaptation GFR               | Yes                                                                                                                                                                                                                                                                                                                          |
| Prescription printing        | No                                                                                                                                                                                                                                                                                                                           |
| Context and reminders        | Yes                                                                                                                                                                                                                                                                                                                          |
| Locally adapted              | No                                                                                                                                                                                                                                                                                                                           |
| Scientific sources cited     | Yes                                                                                                                                                                                                                                                                                                                          |
| References                   | No                                                                                                                                                                                                                                                                                                                           |
| Description                  | N/A                                                                                                                                                                                                                                                                                                                          |

**Table S4.** Characteristics of *Antibiogilar*.

| Antibiogilar          |           |                                                                                                                                                                                      |
|-----------------------|-----------|--------------------------------------------------------------------------------------------------------------------------------------------------------------------------------------|
| Administration        |           |                                                                                                                                                                                      |
| Name                  |           | Groupement d'Infectiologie et de Lutte contre l'Antibio Résistance (GILAR)                                                                                                           |
| Funding               | Nature    | Public                                                                                                                                                                               |
|                       | Name(s)   | - ARS Hauts-de-France<br>- Groupement d'Infectiologie et de Lutte contre l'Antibio Résistance                                                                                        |
| Scientific references |           | Local and national guidelines from French Infectious Diseases Society (SPILF), French National Agency for the Safety of Medicines (ANSM), French National Authority for Health (HAS) |
| Date of creation      |           | February 2019                                                                                                                                                                        |
| Updating              | Last      | May 2021                                                                                                                                                                             |
|                       | Frequency | Monthly                                                                                                                                                                              |
| Contact               |           | antibiogilar@gmail.com                                                                                                                                                               |
| Access                |           |                                                                                                                                                                                      |
| Cost                  |           | Free                                                                                                                                                                                 |

|                                                    |                                                                                     |
|----------------------------------------------------|-------------------------------------------------------------------------------------|
| Smartphone app                                     | Yes                                                                                 |
|                                                    | iOS                                                                                 |
| Downloads (n)                                      | N/A                                                                                 |
| Reviews (n)                                        | 5                                                                                   |
| Rating (/5)                                        | 4,8                                                                                 |
| Android                                            | Yes                                                                                 |
| Downloads (n)                                      | N/A                                                                                 |
| Reviews (n)                                        | 11                                                                                  |
| Rating (/5)                                        | 4,5                                                                                 |
| Website                                            | Yes                                                                                 |
| Website URL                                        | <a href="https://www.gilar.org/antibiogilar">https://www.gilar.org/antibiogilar</a> |
| Users/day (n)                                      | N/A                                                                                 |
| Requests/day (n)                                   | N/A                                                                                 |
| Offline mode                                       | Yes                                                                                 |
| Software                                           | No                                                                                  |
| Local parameterization possible                    | Yes                                                                                 |
| Developer                                          | Yes                                                                                 |
| User                                               | N/A                                                                                 |
| Users                                              |                                                                                     |
| Primary care                                       | Yes                                                                                 |
| Dental medicine                                    | No                                                                                  |
| Hospital medicine                                  | Yes                                                                                 |
| Surgical prophylaxis                               | Yes                                                                                 |
| Patients                                           |                                                                                     |
| Children                                           | Yes                                                                                 |
| Pregnant women                                     | Yes (incomplete)                                                                    |
| Breastfeeding                                      | No                                                                                  |
| Chronic kidney disease                             | Yes                                                                                 |
| Informations                                       |                                                                                     |
| Type of infection                                  | Urinary tract infections                                                            |
|                                                    | Genital infections                                                                  |
|                                                    | Upper respiratory tract infections                                                  |
|                                                    | Lower respiratory tract infections                                                  |
|                                                    | Skin and soft tissues infections                                                    |
|                                                    | Digestive tract infections                                                          |
|                                                    | Prophylaxis                                                                         |
|                                                    | Central nervous system infections                                                   |
|                                                    | Cardiovascular infections                                                           |
|                                                    | Bone and joint infections                                                           |
|                                                    | Febrile neutropenia                                                                 |
|                                                    | COVID-19                                                                            |
|                                                    |                                                                                     |
| Systematic criteria                                | Site of infection                                                                   |
| Optional criteria                                  | Nature of infection                                                                 |
| Additionnal information about infection or patient |                                                                                     |
| Type of information provided                       |                                                                                     |
| Antibiotic selection                               | Yes                                                                                 |
| Priority                                           | Yes                                                                                 |
| Dose                                               | Yes                                                                                 |
| Route of administration                            | Inconstant                                                                          |
| Duration                                           | Yes                                                                                 |
| Allergy                                            | Yes                                                                                 |
| Side effects                                       | No                                                                                  |
| Adaptation GFR                                     | Yes                                                                                 |
| Prescription printing                              | No                                                                                  |
| Context and reminders                              | Yes                                                                                 |

|                          |     |
|--------------------------|-----|
| Locally adapted          | Yes |
| Scientific sources cited | Yes |
| References               | No  |
| Description              | N/A |

**Table S5.** Characteristics of *antibioGUIDE* (Basse-Normandie).

| antibioGUIDE (Basse-Normandie)  |                                                                                                                                                                                                                                                                                                                                                 |                     |
|---------------------------------|-------------------------------------------------------------------------------------------------------------------------------------------------------------------------------------------------------------------------------------------------------------------------------------------------------------------------------------------------|---------------------|
| Administration                  |                                                                                                                                                                                                                                                                                                                                                 |                     |
| Name                            | Omedit Basse-Normandie                                                                                                                                                                                                                                                                                                                          |                     |
|                                 | ARS Basse-Normandie                                                                                                                                                                                                                                                                                                                             |                     |
|                                 | CClin-ARlin Basse-Normandie                                                                                                                                                                                                                                                                                                                     |                     |
| Funding                         | Nature                                                                                                                                                                                                                                                                                                                                          | Public              |
|                                 | Name(s)                                                                                                                                                                                                                                                                                                                                         | ARS Basse-Normandie |
| Scientific references           | International and national guide-<br>lines from French Infectious Dis-<br>eases Society (SPILF), College of<br>Professors of Infectious and Tropi-<br>cal Diseases (CMIT), French Na-<br>tional Authority for Health (HAS),<br>Infectious Diseases Society of Amer-<br>ica (IDSA), French National Agency<br>for the Safety of Medicines (ANSM) |                     |
| Date of creation                |                                                                                                                                                                                                                                                                                                                                                 | April 2015          |
| Updating                        | Last                                                                                                                                                                                                                                                                                                                                            | July 2015           |
|                                 | Frequency                                                                                                                                                                                                                                                                                                                                       | < yearly            |
| Contact                         | ars-bnormandie-omedit@ars.sante.fr                                                                                                                                                                                                                                                                                                              |                     |
| Access                          |                                                                                                                                                                                                                                                                                                                                                 |                     |
| Cost                            | Free                                                                                                                                                                                                                                                                                                                                            |                     |
| Smartphone app                  | Yes                                                                                                                                                                                                                                                                                                                                             |                     |
| iOS                             | Yes                                                                                                                                                                                                                                                                                                                                             |                     |
| Downloads (n)                   | N/A                                                                                                                                                                                                                                                                                                                                             |                     |
| Reviews (n)                     | N/A                                                                                                                                                                                                                                                                                                                                             |                     |
| Rating (/5)                     | N/A                                                                                                                                                                                                                                                                                                                                             |                     |
| Android                         | Yes                                                                                                                                                                                                                                                                                                                                             |                     |
| Downloads (n)                   | N/A                                                                                                                                                                                                                                                                                                                                             |                     |
| Reviews (n)                     | N/A                                                                                                                                                                                                                                                                                                                                             |                     |
| Rating (/5)                     | N/A                                                                                                                                                                                                                                                                                                                                             |                     |
| Website                         | Yes                                                                                                                                                                                                                                                                                                                                             |                     |
| Website URL                     | http://antibioguide.free.fr/                                                                                                                                                                                                                                                                                                                    |                     |
| Users/day (n)                   | N/A                                                                                                                                                                                                                                                                                                                                             |                     |
| Requests/day (n)                | N/A                                                                                                                                                                                                                                                                                                                                             |                     |
| Offline mode                    | Yes                                                                                                                                                                                                                                                                                                                                             |                     |
| Software                        | No                                                                                                                                                                                                                                                                                                                                              |                     |
| Local parameterization possible | No                                                                                                                                                                                                                                                                                                                                              |                     |
| Developer                       | No                                                                                                                                                                                                                                                                                                                                              |                     |
| User                            | No                                                                                                                                                                                                                                                                                                                                              |                     |
| Users                           |                                                                                                                                                                                                                                                                                                                                                 |                     |
| Primary care                    | Yes                                                                                                                                                                                                                                                                                                                                             |                     |
| Dental medicine                 | No                                                                                                                                                                                                                                                                                                                                              |                     |
| Hospital medicine               | Yes                                                                                                                                                                                                                                                                                                                                             |                     |
| Surgical prophylaxis            | No                                                                                                                                                                                                                                                                                                                                              |                     |
| Patients                        |                                                                                                                                                                                                                                                                                                                                                 |                     |
| Children                        | Yes (incomplete)                                                                                                                                                                                                                                                                                                                                |                     |
| Pregnant women                  | Yes (incomplete)                                                                                                                                                                                                                                                                                                                                |                     |

|                              |                                                    |
|------------------------------|----------------------------------------------------|
| Breastfeeding                | No                                                 |
| Chronic kidney disease       | No (refers to GPR website)                         |
| Informations                 |                                                    |
| Type of infection            | Urinary tract infections                           |
|                              | Genital infections                                 |
|                              | Upper respiratory tract infections                 |
|                              | Lower respiratory tract infections                 |
|                              | Skin and soft tissues infections                   |
|                              | Digestive tract infections                         |
|                              | Central nervous system infections                  |
|                              | Bone and joint infections                          |
| Systematic criteria          | Febrile neutropenia                                |
|                              | Site of infection                                  |
| Nature of infection          |                                                    |
| Optional criteria            | Additionnal information about patient or infection |
| Type of information provided |                                                    |
| Antibiotic selection         | Yes                                                |
| Priority                     | Inconstant                                         |
| Dose                         | Yes                                                |
| Route of administration      | Inconstant                                         |
| Duration                     | Yes                                                |
| Allergy                      | Yes                                                |
| Side effects                 | No                                                 |
| Adaptation GFR               | No                                                 |
| Prescription printing        | No                                                 |
| Context and reminders        | No                                                 |
| Locally adapted              | No                                                 |
| Scientific sources cited     | Yes                                                |
| References                   | No                                                 |
| Description                  | N/A                                                |

**Table S6.** Characteristics of *Antibioguide* (Perpignan).

| Antibioguide (Perpignan) |                |                                                                                                                                                                            |
|--------------------------|----------------|----------------------------------------------------------------------------------------------------------------------------------------------------------------------------|
| Administration           |                |                                                                                                                                                                            |
| Name                     |                | Commission des anti-infectieux du CH de Perpignan                                                                                                                          |
| Funding                  | Nature         | Public                                                                                                                                                                     |
|                          | Name(s)        | N/A                                                                                                                                                                        |
| Scientific references    |                | National guidelines from French Infectious Diseases Society (SPILF), French National Agency for the Safety of Medicines (ANSM), French National Authority for Health (HAS) |
| Date of creation         |                | 2018                                                                                                                                                                       |
| Updating                 | Last           | January 2020                                                                                                                                                               |
|                          | Frequency      | Yearly                                                                                                                                                                     |
| Contact                  |                | aurelia.eden@ch-perpignan.fr                                                                                                                                               |
| Access                   |                |                                                                                                                                                                            |
|                          | Cost           | Free                                                                                                                                                                       |
|                          | Smartphone app | Yes                                                                                                                                                                        |
|                          | iOS            | No                                                                                                                                                                         |
|                          | Downloads (n)  | N/A                                                                                                                                                                        |
|                          | Reviews (n)    | N/A                                                                                                                                                                        |

|                     |                                                    |                  |
|---------------------|----------------------------------------------------|------------------|
|                     | Rating (/5)                                        | N/A              |
|                     | Android                                            | Yes              |
|                     | Downloads (n)                                      | N/A              |
|                     | Reviews (n)                                        | 8                |
|                     | Rating (/5)                                        | 5                |
| Website             |                                                    | No               |
|                     | Users/day (n)                                      | N/A              |
|                     | Requests/day (n)                                   | N/A              |
|                     | Offline mode                                       | No               |
|                     | Software                                           | No               |
|                     | Local parameterization possible                    | No               |
|                     | Developer                                          | No               |
|                     | User                                               | No               |
|                     | Users                                              |                  |
|                     | Primary care                                       | Yes              |
|                     | Dental medicine                                    | No               |
|                     | Hospital medicine                                  | Yes              |
|                     | Surgical prophylaxis                               | No               |
|                     | Patients                                           |                  |
|                     | Children                                           | Yes (incomplete) |
|                     | Pregnant women                                     | Yes (incomplete) |
|                     | Breastfeeding                                      | No               |
|                     | Chronic kidney disease                             | No               |
|                     | Informations                                       |                  |
|                     | Urinary tract infections                           |                  |
|                     | Genital infections                                 |                  |
|                     | Upper respiratory tract infections                 |                  |
|                     | Lower respiratory tract infections                 |                  |
|                     | Skin and soft tissues infections                   |                  |
|                     | Digestive tract infections                         |                  |
|                     | Central nervous system infections                  |                  |
|                     | Bone and joint infections                          |                  |
|                     | Febrile neutropenia                                |                  |
|                     | Site of infection                                  |                  |
|                     | Nature of infection                                |                  |
| Systematic criteria |                                                    |                  |
| Optional criteria   | Additionnal information about infection or patient |                  |
|                     | Type of information provided                       |                  |
|                     | Antibiotic selection                               | Yes              |
|                     | Priority                                           | Yes              |
|                     | Dose                                               | Yes              |
|                     | Route of administration                            | Yes              |
|                     | Duration                                           | Yes              |
|                     | Allergy                                            | Yes              |
|                     | Side effects                                       | No               |
|                     | Adaptation GFR                                     | No               |
|                     | Prescription printing                              | No               |
|                     | Context and reminders                              | No               |
|                     | Locally adapted                                    | No               |
|                     | Scientific sources cited                           | No               |
|                     | References                                         | No               |
|                     | Description                                        | N/A              |



**Table S7.** Characteristics of *AntibioEst*.

| AntibioEst                        |                                    |                                                                                                                                                  |
|-----------------------------------|------------------------------------|--------------------------------------------------------------------------------------------------------------------------------------------------|
| Administration                    |                                    |                                                                                                                                                  |
| Name                              |                                    | Association AntibioEst                                                                                                                           |
| Funding                           | Nature                             | Public                                                                                                                                           |
| Name(s)                           |                                    | - ARS Grand-Est<br>- Association AntibioEst                                                                                                      |
| Scientific references             |                                    | European and national guidelines from scientic societies, French Infectious Diseases Society (SPILF), French National Authority for Health (HAS) |
| Date of creation                  |                                    | 2018                                                                                                                                             |
| Updating                          | Last                               | June 2021                                                                                                                                        |
|                                   | Frequency                          | Yearly                                                                                                                                           |
| Contact                           |                                    | antibioest@chru-nancy.fr                                                                                                                         |
| Access                            |                                    |                                                                                                                                                  |
| Cost                              |                                    | Free                                                                                                                                             |
| Smartphone app                    |                                    | Yes                                                                                                                                              |
| iOS                               |                                    | Yes                                                                                                                                              |
| Downloads (n)                     |                                    | N/A                                                                                                                                              |
| Reviews (n)                       |                                    | 5                                                                                                                                                |
| Rating (/5)                       |                                    | 4,8                                                                                                                                              |
| Android                           |                                    | Yes                                                                                                                                              |
| Downloads (n)                     |                                    | N/A                                                                                                                                              |
| Reviews (n)                       |                                    | 5                                                                                                                                                |
| Rating (/5)                       |                                    | 4,2                                                                                                                                              |
| Website                           |                                    | Yes                                                                                                                                              |
| Website URL                       |                                    | https://guides.antibioest.org/                                                                                                                   |
| Users/day (n)                     |                                    | N/A                                                                                                                                              |
| Requests/day (n)                  |                                    | N/A                                                                                                                                              |
| Offline mode                      |                                    | No                                                                                                                                               |
| Software                          |                                    | No                                                                                                                                               |
| Local parameterization possible   |                                    | No                                                                                                                                               |
| Developer                         |                                    | No                                                                                                                                               |
| User                              |                                    | No                                                                                                                                               |
| Users                             |                                    |                                                                                                                                                  |
| Primary care                      |                                    | Yes                                                                                                                                              |
| Dental medicine                   |                                    | Yes                                                                                                                                              |
| Hospital medicine                 |                                    | Yes                                                                                                                                              |
| Surgical prophylaxis              |                                    | Yes                                                                                                                                              |
| Patients                          |                                    |                                                                                                                                                  |
| Children                          |                                    | Yes                                                                                                                                              |
| Pregnant women                    |                                    | Yes (incomplete)                                                                                                                                 |
| Breastfeeding                     |                                    | No                                                                                                                                               |
| Chronic kidney disease            |                                    | Yes                                                                                                                                              |
| Informations                      |                                    |                                                                                                                                                  |
| Type of infection                 | Urinary tract infections           |                                                                                                                                                  |
|                                   | Genital infections                 |                                                                                                                                                  |
|                                   | Upper respiratory tract infections |                                                                                                                                                  |
|                                   | Lower respiratory tract infections |                                                                                                                                                  |
|                                   | Skin and soft tissues infections   |                                                                                                                                                  |
|                                   | Digestive tract infections         |                                                                                                                                                  |
|                                   | Prophylaxis                        |                                                                                                                                                  |
| Central nervous system infections |                                    |                                                                                                                                                  |

|                              |                                                              |
|------------------------------|--------------------------------------------------------------|
|                              | Cardiovascular infections                                    |
|                              | Bone and joint infections                                    |
|                              | Febrile neutropenia                                          |
|                              | Bloodstream infections                                       |
|                              | Eye infections                                               |
|                              | Dental infections                                            |
| Systematic criteria          | Site of infection                                            |
|                              | Nature of infection                                          |
| Optional criteria            | Additionnal information about infection, pathogen or patient |
| Type of information provided |                                                              |
| Antibiotic selection         | Yes                                                          |
| Priority                     | Yes                                                          |
| Dose                         | Yes                                                          |
| Route of administration      | Yes                                                          |
| Duration                     | Yes                                                          |
| Allergy                      | Yes                                                          |
| Side effects                 | No                                                           |
| Adaptation GFR               | Yes                                                          |
| Prescription printing        | No                                                           |
| Context and reminders        | Yes                                                          |
| Locally adapted              | No                                                           |
| Scientific sources cited     | Yes                                                          |
| References                   | No                                                           |
| Description                  | N/A                                                          |

**Table S8.** Characteristics of *APPLIBIOTIC*.

| APPLIBIOTIC           |           |                                                                                                                                                                                                                       |
|-----------------------|-----------|-----------------------------------------------------------------------------------------------------------------------------------------------------------------------------------------------------------------------|
| Administration        |           |                                                                                                                                                                                                                       |
| Name                  |           | Polyclinique Bordeaux Nord                                                                                                                                                                                            |
| Funding               | Nature    | Private                                                                                                                                                                                                               |
|                       | Name(s)   | Polyclinique Bordeaux Nord                                                                                                                                                                                            |
| Scientific references |           | Local and national guidelines from French scientific societies (SFAR, SRLF, SPILF, CNGOF, SFRP, GPPiP, GRIOGO), French National Agency for the Safety of Medicines (ANSM), French National Authority for Health (HAS) |
| Date of creation      |           | March 2017                                                                                                                                                                                                            |
| Updating              | Last      | October 2019                                                                                                                                                                                                          |
|                       | Frequency | Variable                                                                                                                                                                                                              |
| Contact               |           | applibiotic@bordeauxnord.com                                                                                                                                                                                          |
| Access                |           |                                                                                                                                                                                                                       |
| Cost                  |           | Free                                                                                                                                                                                                                  |
| Smartphone app        |           | Yes                                                                                                                                                                                                                   |
| iOS                   |           | Yes                                                                                                                                                                                                                   |
| Downloads (n)         |           | N/A                                                                                                                                                                                                                   |
| Reviews (n)           |           | 4                                                                                                                                                                                                                     |
| Rating (/5)           |           | 5                                                                                                                                                                                                                     |
| Android               |           | Yes                                                                                                                                                                                                                   |
| Downloads (n)         |           | N/A                                                                                                                                                                                                                   |
| Reviews (n)           |           | 21                                                                                                                                                                                                                    |
| Rating (/5)           |           | 4,8                                                                                                                                                                                                                   |

|                                 |                                                              |
|---------------------------------|--------------------------------------------------------------|
| Website                         | No                                                           |
|                                 | Users/day (n)                                                |
| Requests/day (n)                | N/A                                                          |
|                                 | Offline mode                                                 |
| Software                        | Yes                                                          |
| Local parameterization possible | No                                                           |
| Developer                       | No                                                           |
| User                            | No                                                           |
| Users                           |                                                              |
| Primary care                    | Yes                                                          |
| Dental medicine                 | Yes                                                          |
| Hospital medicine               | Yes                                                          |
| Surgical prophylaxis            | Yes                                                          |
| Patients                        |                                                              |
| Children                        | Yes                                                          |
| Pregnant women                  | Yes (incomplete)                                             |
| Breastfeeding                   | No                                                           |
| Chronic kidney disease          | No                                                           |
| Informations                    |                                                              |
| Type of infection               | Urinary tract infections                                     |
|                                 | Genital infections                                           |
|                                 | Upper respiratory tract infections                           |
|                                 | Lower respiratory tract infections                           |
|                                 | Skin and soft tissues infections                             |
|                                 | Digestive tract infections                                   |
|                                 | Prophylaxis                                                  |
|                                 | Central nervous system infections                            |
|                                 | Cardiovascular infections                                    |
|                                 | Bone and joint infections                                    |
|                                 | Febrile neutropenia                                          |
|                                 | Eye infections                                               |
|                                 | Central venous catheter-related infections                   |
|                                 | Dental infections                                            |
|                                 | Site of infection                                            |
| Systematic criteria             | Nature of infection                                          |
| Optional criteria               | Additionnal information about infection, pathogen or patient |
| Type of information provided    |                                                              |
| Antibiotic selection            | Yes                                                          |
| Priority                        | Yes                                                          |
| Dose                            | Yes                                                          |
| Route of administration         | Yes                                                          |
| Duration                        | Yes                                                          |
| Allergy                         | Yes                                                          |
| Side effects                    | No                                                           |
| Adaptation GFR                  | No                                                           |
| Prescription printing           | No                                                           |
| Context and reminders           | Yes                                                          |
| Locally adapted                 | No                                                           |
| Scientific sources cited        | Yes                                                          |
| References                      | No                                                           |
| Description                     | N/A                                                          |

**Table S9.** Characteristics of *ePOPI*.

| ePOPI                           |                                                                                           |                                                                                                                                                                                                                                                                                           |
|---------------------------------|-------------------------------------------------------------------------------------------|-------------------------------------------------------------------------------------------------------------------------------------------------------------------------------------------------------------------------------------------------------------------------------------------|
| Administration                  |                                                                                           |                                                                                                                                                                                                                                                                                           |
| Name                            |                                                                                           | College of Professors of Infectious and Tropical Diseases (CMIT)                                                                                                                                                                                                                          |
| Funding                         | Nature                                                                                    | Public                                                                                                                                                                                                                                                                                    |
|                                 | Name(s)                                                                                   | College of Professors of Infectious and Tropical Diseases (CMIT)                                                                                                                                                                                                                          |
| Scientific references           |                                                                                           | International, european and national guidelines from World Heath Organization (WHO), European Medicines Agency (EMA), French National Agency for the Safety of Medicines (ANSM), French Public Health Council (HSCP), French National Authority for Health (HAS) and scientific societies |
| Date of creation                |                                                                                           | 2014                                                                                                                                                                                                                                                                                      |
| Updating                        | Last                                                                                      | July 2021                                                                                                                                                                                                                                                                                 |
|                                 | Frequency                                                                                 | Monthly                                                                                                                                                                                                                                                                                   |
| Contact                         |                                                                                           | contact@epopi.fr                                                                                                                                                                                                                                                                          |
| Access                          |                                                                                           |                                                                                                                                                                                                                                                                                           |
| Cost                            |                                                                                           | 33,00 € per year                                                                                                                                                                                                                                                                          |
| Smartphone app                  |                                                                                           | Yes                                                                                                                                                                                                                                                                                       |
| iOS                             |                                                                                           | Yes                                                                                                                                                                                                                                                                                       |
| Downloads (n)                   |                                                                                           | N/A                                                                                                                                                                                                                                                                                       |
| Reviews (n)                     |                                                                                           | 5                                                                                                                                                                                                                                                                                         |
| Rating (/5)                     |                                                                                           | 2,4                                                                                                                                                                                                                                                                                       |
| Android                         |                                                                                           | Yes                                                                                                                                                                                                                                                                                       |
| Downloads (n)                   |                                                                                           | N/A                                                                                                                                                                                                                                                                                       |
| Reviews (n)                     |                                                                                           | 11                                                                                                                                                                                                                                                                                        |
| Rating (/5)                     |                                                                                           | 3,5                                                                                                                                                                                                                                                                                       |
| Website                         |                                                                                           | Yes                                                                                                                                                                                                                                                                                       |
| Website URL                     |                                                                                           | https://epopi.fr/                                                                                                                                                                                                                                                                         |
| Users/day (n)                   |                                                                                           | N/A                                                                                                                                                                                                                                                                                       |
| Requests/day (n)                |                                                                                           | N/A                                                                                                                                                                                                                                                                                       |
| Offline mode                    |                                                                                           | Yes                                                                                                                                                                                                                                                                                       |
| Software                        |                                                                                           | No                                                                                                                                                                                                                                                                                        |
| Local parameterization possible |                                                                                           | No                                                                                                                                                                                                                                                                                        |
| Developer                       |                                                                                           | No                                                                                                                                                                                                                                                                                        |
| User                            |                                                                                           | No                                                                                                                                                                                                                                                                                        |
| Users                           |                                                                                           |                                                                                                                                                                                                                                                                                           |
| Primary care                    |                                                                                           | Yes                                                                                                                                                                                                                                                                                       |
| Dental medicine                 |                                                                                           | Yes                                                                                                                                                                                                                                                                                       |
| Hospital medicine               |                                                                                           | Yes                                                                                                                                                                                                                                                                                       |
| Surgical prophylaxis            |                                                                                           | Yes                                                                                                                                                                                                                                                                                       |
| Patients                        |                                                                                           |                                                                                                                                                                                                                                                                                           |
| Children                        |                                                                                           | Yes                                                                                                                                                                                                                                                                                       |
| Pregnant women                  |                                                                                           | Yes                                                                                                                                                                                                                                                                                       |
| Breastfeeding                   |                                                                                           | Yes                                                                                                                                                                                                                                                                                       |
| Chronic kidney disease          |                                                                                           | Yes                                                                                                                                                                                                                                                                                       |
| Informations                    |                                                                                           |                                                                                                                                                                                                                                                                                           |
| Type of infection               | Extensive list of infections caused by bacteria, viruses, parasites and fungi including : |                                                                                                                                                                                                                                                                                           |

|                                                              |                                            |
|--------------------------------------------------------------|--------------------------------------------|
| Systematic criteria                                          | Urinary tract infections                   |
|                                                              | Genital infections                         |
|                                                              | Upper respiratory tract infections         |
|                                                              | Lower respiratory tract infections         |
|                                                              | Skin and soft tissues infections           |
|                                                              | Digestive tract infections                 |
|                                                              | Prophylaxis                                |
|                                                              | Central nervous system infections          |
|                                                              | Cardiovascular infections                  |
|                                                              | Bone and joint infections                  |
|                                                              | Febrile neutropenia                        |
|                                                              | Eye infections                             |
|                                                              | Central venous catheter-related infections |
|                                                              | Dental infections                          |
| Optional criteria                                            | Bloodstream infections                     |
|                                                              | Site of infection                          |
| Nature of infection                                          |                                            |
| Additionnal information about infection, pathogen or patient |                                            |
| Type of information provided                                 |                                            |
| Antibiotic selection                                         | Yes                                        |
| Priority                                                     | Yes                                        |
| Dose                                                         | Yes                                        |
| Route of administration                                      | Yes                                        |
| Duration                                                     | Yes                                        |
| Allergy                                                      | Yes                                        |
| Side effects                                                 | Yes                                        |
| Adaptation GFR                                               | Yes                                        |
| Prescription printing                                        | No                                         |
| Context and reminders                                        | Yes                                        |
| Locally adapted                                              | No                                         |
| Scientific sources cited                                     | Yes                                        |
| References                                                   | No                                         |
| Description                                                  | N/A                                        |

**Table S10.** Characteristics of *Prescriptor*.

| <b>Prescriptor</b>    |           |                                                                                     |
|-----------------------|-----------|-------------------------------------------------------------------------------------|
| Administration        |           |                                                                                     |
| Name                  |           | RFCLIN-PRIMAIR                                                                      |
| Funding               | Nature    | Public                                                                              |
|                       | Name(s)   | ARS Franche-Comté                                                                   |
| Scientific references |           | Local and national guidelines from SPILF, CMIT, HAS, SFAR and scientific literature |
| Date of creation      |           | 2014                                                                                |
| Updating              | Last      | March 2017                                                                          |
|                       | Frequency | < yearly                                                                            |
| Contact               |           | jleroy@chu-besancon.fr                                                              |
| Access                |           |                                                                                     |
| Cost                  |           | Free                                                                                |
| Smartphone app        |           | No                                                                                  |
| iOS                   |           | No                                                                                  |
| Downloads (n)         |           | N/A                                                                                 |
| Reviews (n)           |           | N/A                                                                                 |
| Rating (/5)           |           | N/A                                                                                 |

|             |                                                                                           |                  |
|-------------|-------------------------------------------------------------------------------------------|------------------|
|             | Android                                                                                   | No               |
|             | Downloads (n)                                                                             | N/A              |
|             | Reviews (n)                                                                               | N/A              |
|             | Rating (/5)                                                                               | N/A              |
| Website     |                                                                                           | Yes              |
| Website URL | <a href="https://guides-bua.azurewebsites.net/">https://guides-bua.azurewebsites.net/</a> |                  |
|             | Users/day (n)                                                                             | N/A              |
|             | Requests/day (n)                                                                          | N/A              |
|             | Offline mode                                                                              | Yes              |
|             | Software                                                                                  | Yes              |
|             | Local parameterization possible                                                           | No               |
|             | Developer                                                                                 | No               |
|             | User                                                                                      | No               |
|             | Users                                                                                     |                  |
|             | Primary care                                                                              | Yes              |
|             | Dental medicine                                                                           | No               |
|             | Hospital medicine                                                                         | Yes              |
|             | Surgical prophylaxis                                                                      | No               |
|             | Patients                                                                                  |                  |
|             | Children                                                                                  | No               |
|             | Pregnant women                                                                            | Yes (incomplete) |
|             | Breastfeeding                                                                             | No               |
|             | Chronic kidney disease                                                                    | No               |
|             | Informations                                                                              |                  |
|             | Urinary tract infections                                                                  |                  |
|             | Infections in obstetrics and gynecology                                                   |                  |
|             | Intra-abdominal infections                                                                |                  |
|             | Central venous catheter-related infections                                                |                  |
|             | Antibiotic prophylaxis in pregnancy                                                       |                  |
|             | Site of infection                                                                         |                  |
|             | Nature of infection                                                                       |                  |
|             | Additional information about infection, pathogen or patient                               |                  |
|             | Type of information provided                                                              |                  |
|             | Antibiotic selection                                                                      | Yes              |
|             | Priority                                                                                  | Inconstant       |
|             | Dose                                                                                      | Yes              |
|             | Route of administration                                                                   | Yes              |
|             | Duration                                                                                  | Yes              |
|             | Allergy                                                                                   | Yes              |
|             | Side effects                                                                              | No               |
|             | Adaptation GFR                                                                            | No               |
|             | Prescription printing                                                                     | No               |
|             | Context and reminders                                                                     | Yes              |
|             | Locally adapted                                                                           | Yes              |
|             | Scientific sources cited                                                                  | Yes              |
|             | References                                                                                | No               |
|             | Description                                                                               | N/A              |

**Table S11.** Characteristics of *Antibiothérapie Pédiatrique*.

| Antibiothérapie Pédiatrique |        |                    |
|-----------------------------|--------|--------------------|
| Administration              |        |                    |
| Name                        |        | CHU Sainte-Justine |
| Funding                     | Nature | Unknown            |

|                                 |                                                                                                    |                                                       |
|---------------------------------|----------------------------------------------------------------------------------------------------|-------------------------------------------------------|
| Name(s)                         |                                                                                                    | Unknown                                               |
| Scientific references           |                                                                                                    | Local (mainly), national and international guidelines |
| Date of creation                |                                                                                                    | 2019                                                  |
| Updating                        | Last                                                                                               | August 2021                                           |
|                                 | Frequency                                                                                          | Monthly                                               |
| Contact                         |                                                                                                    | ME@messil.com                                         |
| Access                          |                                                                                                    |                                                       |
| Cost                            |                                                                                                    | 19,99 € per year                                      |
| Smartphone app                  | Yes                                                                                                |                                                       |
|                                 | iOS                                                                                                | Yes                                                   |
|                                 | Downloads (n)                                                                                      | N/A                                                   |
|                                 | Reviews (n)                                                                                        | N/A                                                   |
|                                 | Rating (/5)                                                                                        | N/A                                                   |
|                                 | Android                                                                                            | Yes                                                   |
|                                 | Downloads (n)                                                                                      | N/A                                                   |
|                                 | Reviews (n)                                                                                        | N/A                                                   |
|                                 | Rating (/5)                                                                                        | N/A                                                   |
|                                 | No                                                                                                 |                                                       |
| Website                         |                                                                                                    |                                                       |
| Users/day (n)                   |                                                                                                    | N/A                                                   |
| Requests/day (n)                |                                                                                                    | N/A                                                   |
| Offline mode                    |                                                                                                    | Yes                                                   |
| Software                        |                                                                                                    | No                                                    |
| Local parameterization possible |                                                                                                    | No                                                    |
| Developer                       |                                                                                                    | No                                                    |
| User                            |                                                                                                    | No                                                    |
| Users                           |                                                                                                    |                                                       |
| Primary care                    |                                                                                                    | Yes                                                   |
| Dental medicine                 |                                                                                                    | Yes                                                   |
| Hospital medicine               |                                                                                                    | Yes                                                   |
| Surgical prophylaxis            |                                                                                                    | No                                                    |
| Patients                        |                                                                                                    |                                                       |
| Children                        |                                                                                                    | Yes (exclusively)                                     |
| Pregnant women                  |                                                                                                    | No                                                    |
| Breastfeeding                   |                                                                                                    | No                                                    |
| Chronic kidney disease          |                                                                                                    | No                                                    |
| Informations                    |                                                                                                    |                                                       |
| Type of infection               | Extensive list of pediatric infections caused by bacteria, viruses, parasites and fungi including: |                                                       |
|                                 | Neonatal infections                                                                                |                                                       |
|                                 | Urinary tract infections                                                                           |                                                       |
|                                 | Upper respiratory tract infections                                                                 |                                                       |
|                                 | Lower respiratory tract infections                                                                 |                                                       |
|                                 | Skin and soft tissues infections                                                                   |                                                       |
|                                 | Digestive tract infections                                                                         |                                                       |
|                                 | Prophylaxis                                                                                        |                                                       |
|                                 | Central nervous system infections                                                                  |                                                       |
|                                 | Cardiovascular infections                                                                          |                                                       |
|                                 | Bone and joint infections                                                                          |                                                       |
|                                 | Febrile neutropenia                                                                                |                                                       |
|                                 | Eye infections                                                                                     |                                                       |
|                                 | Central venous catheter-related infections                                                         |                                                       |
|                                 | Dental infections                                                                                  |                                                       |
| Systematic criteria             |                                                                                                    | Nature of infection                                   |
| Optional criteria               |                                                                                                    | N/A                                                   |

| Type of information provided |     |
|------------------------------|-----|
| Antibiotic selection         | Yes |
| Priority                     | Yes |
| Dose                         | Yes |
| Route of administration      | Yes |
| Duration                     | Yes |
| Allergy                      | Yes |
| Side effects                 | Yes |
| Adaptation GFR               | No  |
| Prescription printing        | No  |
| Context and reminders        | Yes |
| Locally adapted              | Yes |
| Scientific sources cited     | No  |
| References                   | No  |
| Description                  | N/A |

**Table S12.** Characteristics of *AntibioHelp*®.

| AntibioHelp®                                          |           |                                                                                                                                     |
|-------------------------------------------------------|-----------|-------------------------------------------------------------------------------------------------------------------------------------|
| Administration                                        |           |                                                                                                                                     |
| Name                                                  |           | RaMiPA project (Raisonner pour Mieux Prescrire les Antibiotiques)                                                                   |
| Funding                                               | Nature    | French National Agency for the Safety of Medicines (ANSM)                                                                           |
| Name(s)                                               |           | Public                                                                                                                              |
| French and International Clinical Practice Guidelines |           |                                                                                                                                     |
| Scientific references                                 |           | Clinical expertise (Dr Frederic Mechaï infectious disease consultant at Avicenne, and Dr Mounira Lafarge microbiologist consultant) |
| Date of creation                                      |           | 2020                                                                                                                                |
| Updating                                              | Last      | 2020                                                                                                                                |
|                                                       | Frequency | N/A                                                                                                                                 |
| Contact                                               |           | rosy.tsopra@nhs.net                                                                                                                 |
| Access                                                |           |                                                                                                                                     |
| Cost                                                  |           | Free                                                                                                                                |
| Smartphone app                                        |           | N/A                                                                                                                                 |
| iOS                                                   |           | N/A                                                                                                                                 |
| Downloads (n)                                         |           | N/A                                                                                                                                 |
| Reviews (n)                                           |           | N/A                                                                                                                                 |
| Rating (/5)                                           |           | N/A                                                                                                                                 |
| Android                                               |           | N/A                                                                                                                                 |
| Downloads (n)                                         |           | N/A                                                                                                                                 |
| Reviews (n)                                           |           | N/A                                                                                                                                 |
| Rating (/5)                                           |           | N/A                                                                                                                                 |
| Website                                               |           | Yes                                                                                                                                 |
| Website URL                                           |           | https://antibiohelp.doctoproject.fr/login                                                                                           |
| Users/day (n)                                         |           | N/A                                                                                                                                 |
| Requests/day (n)                                      |           | N/A                                                                                                                                 |
| Offline mode                                          |           | No                                                                                                                                  |
| Software                                              |           | No                                                                                                                                  |
| Local parameterization possible                       |           | No                                                                                                                                  |
| Developer                                             |           | Yes                                                                                                                                 |



|            |                                                                                                                                                                                                                                                                                                                  |           |
|------------|------------------------------------------------------------------------------------------------------------------------------------------------------------------------------------------------------------------------------------------------------------------------------------------------------------------|-----------|
|            | User                                                                                                                                                                                                                                                                                                             | No        |
|            | Users                                                                                                                                                                                                                                                                                                            |           |
|            | Primary care                                                                                                                                                                                                                                                                                                     | Yes       |
|            | Dental medicine                                                                                                                                                                                                                                                                                                  | No        |
|            | Hospital medicine                                                                                                                                                                                                                                                                                                | No        |
|            | Surgical prophylaxis                                                                                                                                                                                                                                                                                             | No        |
|            | Patients                                                                                                                                                                                                                                                                                                         |           |
|            | Children                                                                                                                                                                                                                                                                                                         | Yes       |
|            | Pregnant women                                                                                                                                                                                                                                                                                                   | Yes       |
|            | Breastfeeding                                                                                                                                                                                                                                                                                                    | No        |
|            | Chronic kidney disease                                                                                                                                                                                                                                                                                           | No        |
|            | Informations                                                                                                                                                                                                                                                                                                     |           |
|            | 11 infectious diseases among :                                                                                                                                                                                                                                                                                   |           |
|            | Urinary tract infections                                                                                                                                                                                                                                                                                         |           |
|            | Upper respiratory tract infections                                                                                                                                                                                                                                                                               |           |
|            | Lower respiratory tract infections                                                                                                                                                                                                                                                                               |           |
|            | Genital infections                                                                                                                                                                                                                                                                                               |           |
|            | Site of infection                                                                                                                                                                                                                                                                                                |           |
|            | Nature of infection                                                                                                                                                                                                                                                                                              |           |
|            | Patient profile (Age, gender, pregnancy)                                                                                                                                                                                                                                                                         |           |
|            | Antibiotic properties                                                                                                                                                                                                                                                                                            |           |
|            | Antibiotic allergy                                                                                                                                                                                                                                                                                               |           |
|            | Additional information about infection                                                                                                                                                                                                                                                                           |           |
|            | Type of information provided                                                                                                                                                                                                                                                                                     |           |
|            | Antibiotic selection                                                                                                                                                                                                                                                                                             | Yes       |
|            | Priority                                                                                                                                                                                                                                                                                                         | Yes       |
|            | Dose                                                                                                                                                                                                                                                                                                             | No (Soon) |
|            | Route of administration                                                                                                                                                                                                                                                                                          | Yes       |
|            | Duration                                                                                                                                                                                                                                                                                                         | No (Soon) |
|            | Allergy                                                                                                                                                                                                                                                                                                          | Yes       |
|            | Side effects                                                                                                                                                                                                                                                                                                     | Yes       |
|            | Adaptation GFR                                                                                                                                                                                                                                                                                                   | No (Soon) |
|            | Prescription printing                                                                                                                                                                                                                                                                                            | No        |
|            | Context and reminders                                                                                                                                                                                                                                                                                            | Yes       |
|            | Locally adapted                                                                                                                                                                                                                                                                                                  | No        |
|            | Scientific sources cited                                                                                                                                                                                                                                                                                         | Yes       |
|            | Tsopra, R. et al. Helping GPs to extrapolate guideline recommendations to patients for whom there are no explicit recommendations, through the visualization of drug properties. The example of Anti-oHelp® in bacterial diseases. Journal of the American Medical Informatics Association 26, 1010–1019 (2019). |           |
| References | Tsopra, R., Lamy, J.-B. & Sedki, K. Using preference learning for detecting inconsistencies in clinical practice guidelines: Methods and application to antibiotherapy. Artif Intell Med 89, 24–33 (2018).                                                                                                       |           |
|            | Tsopra, R., Jais, J.-P., Venot, A. & Duclos, C. Comparison of two kinds of interface, based on guided navigation or usability principles, for improving the adoption of computerized decision support systems: application to the prescription of antibiotics. J Am Med Inform Assoc 21, e107-116 (2014).        |           |

---

Tsopra R, Mechaï F, Sedki K, Lamy JB. Antibio-Help®, an innovative clinical decision support system for improving antibiotic prescriptions in primary care – Newsletter APUA (Alliance for the Prudent Use of Antibiotics) – Summer 2019, Vol 37, No 2.

---

| Description | CDSS description<br>Design process |
|-------------|------------------------------------|
|-------------|------------------------------------|

---
